# Supplementary material for: Engineering biocompatible hydrogen titanate nanocarriers with blood brain barrier (BBB) crossing potential for doxorubicin delivery to glioma cells
Source: Royal Society of Chemistry journal article supplement (doi:10.1039/d5nr00126a), 2025-01-01
Supplement: d5nr00126a1.pdf [file d5nr00126a1.pdf]

## Engineering Biocompatible Hydrogen Titanate Nanocarriers with Blood Brain Barrier (BBB) Crossing Potential for Doxorubicin Delivery to Glioma Cells

Samraggi Choudhury<sup>1, #</sup>, Ghrutanjali Sahu,<sup>2,3, #</sup> Pankaj Kharra,<sup>1</sup> Himanshu Sekhar Panda<sup>1</sup>,  
Laxmidhar Besra,<sup>2</sup> Sriparna Chatterjee<sup>2, \*</sup> Jiban Jyoti Panda<sup>1, \*\*</sup>

<sup>1</sup>Materials Chemistry Department, CSIR-Institute of Minerals and Materials Technology, Acharya Vihar, Bhubaneswar-751013, Odisha, India

<sup>2</sup>Academic of Scientific and Innovative Research (AcSIR), Ghaziabad-201002, India

<sup>3</sup>Institute of Nano Science and Technology, Mohali-140306, Punjab, India

<sup>#</sup>Equal contribution

<sup>\*</sup>Corresponding author: [sriparna@immt.res.in](mailto:sriparna@immt.res.in)

<sup>\*\*</sup>Corresponding author: [jyoti@inst.sc.in](mailto:jyoti@inst.sc.in)

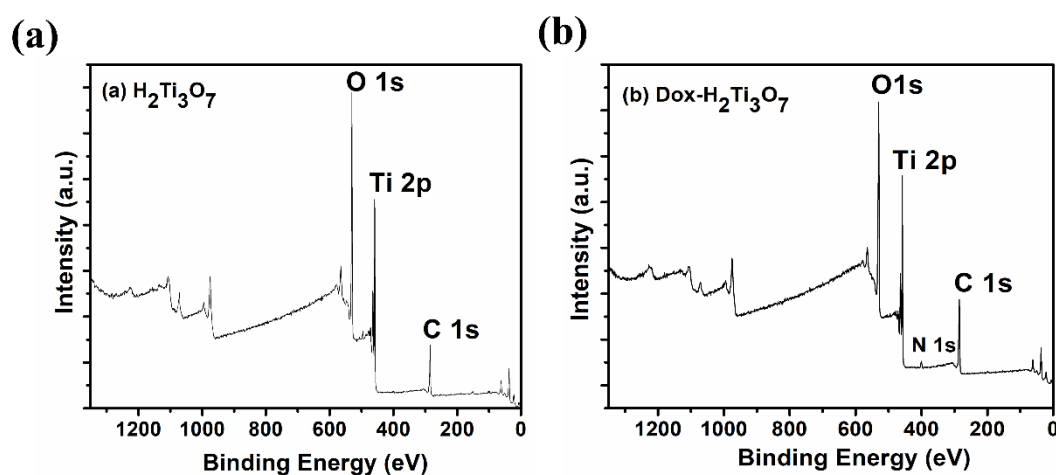

**Figure S1: XPS survey spectra of (a)  $\text{H}_2\text{Ti}_3\text{O}_7$  and (b)  $\text{Dox-H}_2\text{Ti}_3\text{O}_7$ . The spectra show characteristic peaks corresponding to O 1s, Ti 2p, and C 1s. In the Dox-loaded sample (b), an additional N 1s peak is observed, indicating the presence of doxorubicin.**

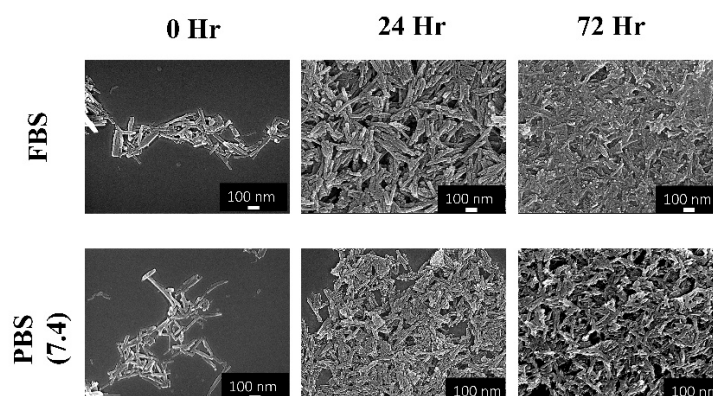

**Figure S2:** FESEM images illustrating the stability of Dox- $\text{H}_2\text{Ti}_3\text{O}_7$  nanotubes in FBS and PBS (pH 7.4) over time. Images show slight aggregation in FBS compared to PBS after 72 hours of interaction. (Scale bars = 100 nm)

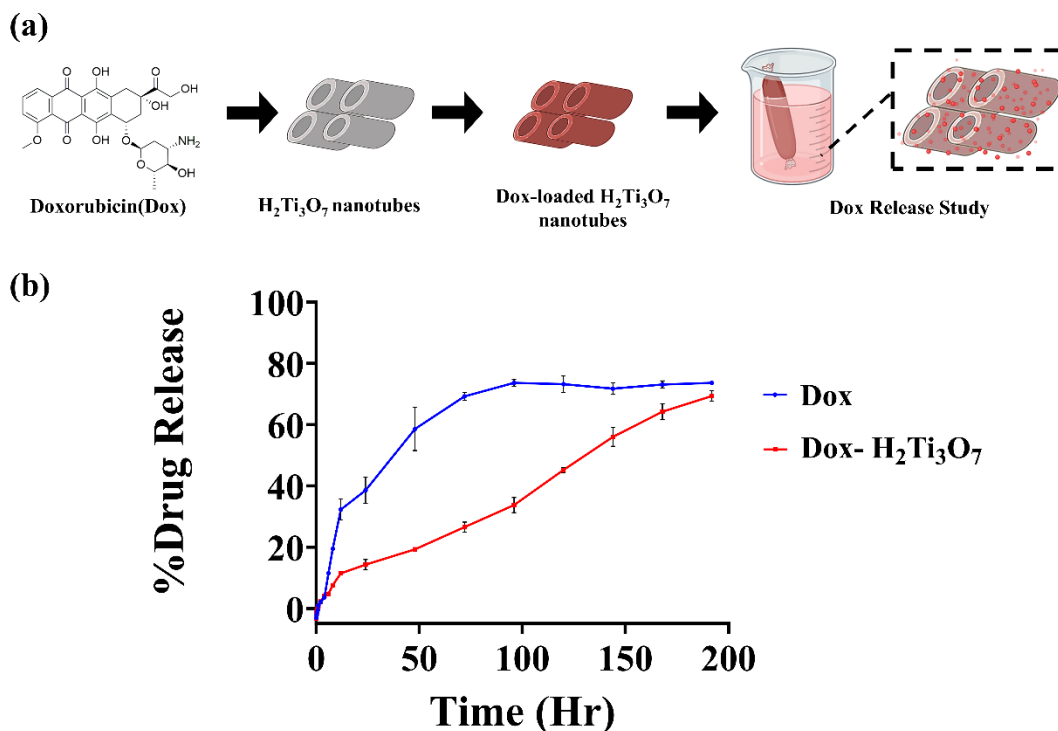

**Figure S3:** (a) The process of Dox loading and release from  $\text{H}_2\text{Ti}_3\text{O}_7$  nanotubes. (b) Graph showing the percentage of drug release from these nanotubes after 192 hours (8 days). (Schematic representation created using [Biorender.com](https://www.biorender.com)).

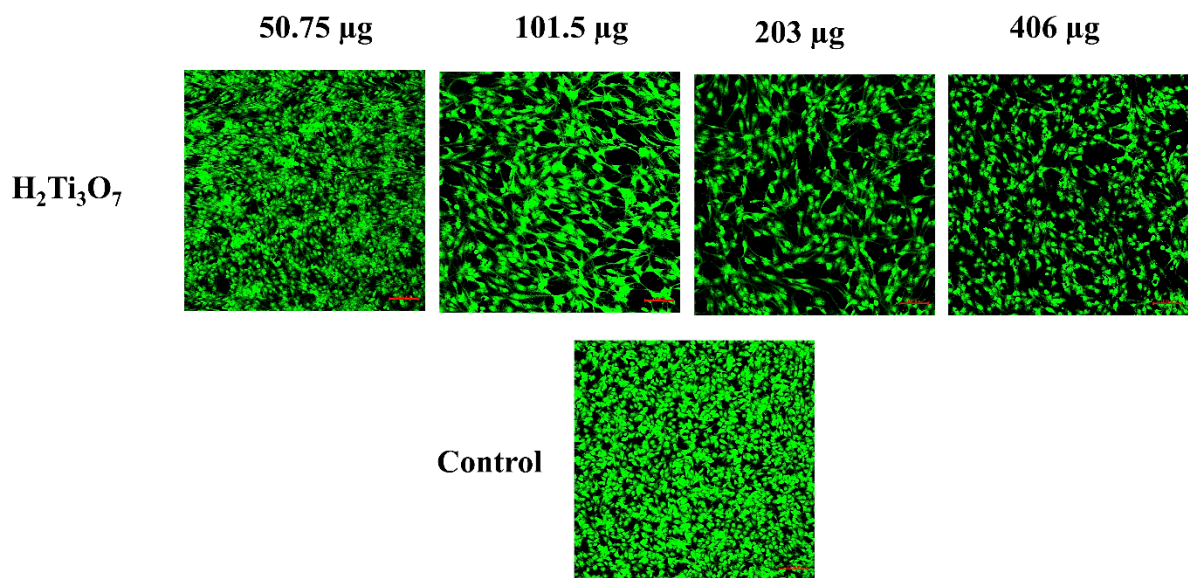

**Figure S4:** Calcein AM staining of C6 cells exposed to  $\text{H}_2\text{Ti}_3\text{O}_7$  nanotubes of equivalent concentration present in Dox- $\text{H}_2\text{Ti}_3\text{O}_7$  nanotubes. (Scalebar:100µm).

**Table 1:** A comparative table highlighting the pros and cons of  $\text{H}_2\text{Ti}_3\text{O}_7$  nanotubes as carrier relative to other commonly used nanocarriers in glioma and cancer therapy.

| Nano Carriers           | Carrier’s Pros                                                                                                              | Carrier’s Cons                                                                                                                                             | References                                           |
|-------------------------|-----------------------------------------------------------------------------------------------------------------------------|------------------------------------------------------------------------------------------------------------------------------------------------------------|------------------------------------------------------|
| Carbon nanotubes (CNTs) | -Efficient Drug Transport: CNTs offer a high capacity for loading therapeutic agents, allowing for effective drug delivery. | <b>-Toxicity Risks:</b><br>Associated with the generation of reactive oxygen species (ROS) and potential neuroinflammation.<br><br><b>- Biodegradation</b> | <sup>1</sup><br><br><sup>2</sup><br><br><sup>3</sup> |

|                            |                                                                                                                                                                                                                                                                                                                                                                           |                                                                                                                                                                                                                                                          |                            |
|----------------------------|---------------------------------------------------------------------------------------------------------------------------------------------------------------------------------------------------------------------------------------------------------------------------------------------------------------------------------------------------------------------------|----------------------------------------------------------------------------------------------------------------------------------------------------------------------------------------------------------------------------------------------------------|----------------------------|
|                            | <p>- Enhanced BBB Crossing: CNTs can achieve unique penetration across the blood-brain barrier (BBB) through surface modifications facilitating targeted delivery to the brain.</p> <p>- Immunomodulatory Effects: CNTs have the potential to modulate immune responses, such as delivering CpG oligonucleotides, which can stimulate immune activity against tumors.</p> | <p><b>Issues:</b> Lack of biodegradability, which complicates their breakdown in biological systems.</p> <p><b>- Environmental Challenges:</b> Difficulties in safe environmental disposal due to their persistence and potential ecological impact.</p> |                            |
| <b>Lipid nanoparticles</b> | <p>- Effective BBB Penetration: HFn liposomes, which efficiently cross the blood-brain barrier.</p> <p>- Minimal Immunogenicity: These nanoparticles tend to elicit a low immune response, reducing the risk of</p>                                                                                                                                                       | <p>- Restricted Drug Capacity: Lipid nanoparticles have a limited ability to carry therapeutic agents, which can limit their effectiveness in delivering high doses of drugs.</p> <p>- Storage Stability Concerns: These</p>                             | <p>4</p> <p>5</p> <p>6</p> |

|                               |                                                                                                                                                                                                                      |                                                                                                                                                                                                                                                                                                                                                                     |                            |
|-------------------------------|----------------------------------------------------------------------------------------------------------------------------------------------------------------------------------------------------------------------|---------------------------------------------------------------------------------------------------------------------------------------------------------------------------------------------------------------------------------------------------------------------------------------------------------------------------------------------------------------------|----------------------------|
|                               | <p>adverse reactions.</p> <p>- Scalable Manufacturing: Production can be easily scaled up, making them suitable for large-scale applications.</p>                                                                    | <p>nanoparticles can be prone to degradation or structural changes during storage, affecting their performance over time.</p> <p>- Dependence on Passive Targeting: Lipid nanoparticles primarily rely on the Enhanced Permeability and Retention (EPR) effect for targeting tumors, which can be less precise and consistent than active targeting strategies.</p> |                            |
| <b>Polymeric nanocarriers</b> | <p>- Adjustable Biodegradation: Materials like chitosan and PLGA can be tailored to degrade at specific rates, allowing for controlled release profiles.</p> <p>- Responsive Drug Release: These polymers can be</p> | <p>- Solubility Issues: Chitosan, for example, exhibits limited solubility in water, which can complicate formulation and delivery.</p> <p>- Thrombogenic Potential: There is a risk of inducing blood clots, which</p>                                                                                                                                             | <p>7</p> <p>8</p> <p>9</p> |

|                                                           |                                                                                                                                                                                                                                                                                                                                     |                                                                                                                                                                                                                                                                    |                     |
|-----------------------------------------------------------|-------------------------------------------------------------------------------------------------------------------------------------------------------------------------------------------------------------------------------------------------------------------------------------------------------------------------------------|--------------------------------------------------------------------------------------------------------------------------------------------------------------------------------------------------------------------------------------------------------------------|---------------------|
|                                                           | <p>engineered to release drugs in response to environmental cues such as pH changes or temperature variations.</p> <p>- Easy Surface Modification: The surfaces of these polymers can be easily modified with targeting ligands or other functional groups, enhancing their ability to interact with specific cells or tissues.</p> | <p>could lead to thrombosis.</p> <p>- Reproducibility Challenges: The production process can result in inconsistent quality between batches, affecting reliability and efficacy.</p>                                                                               |                     |
| <b>H<sub>2</sub>Ti<sub>3</sub>O<sub>7</sub> nanotubes</b> | <p>- Excellent Biocompatibility and Stability: These nanotubes exhibit high compatibility in biological systems and maintain structural integrity over time.</p> <p>- pH-Responsive Drug Release: They can release drugs in response to changes in pH levels, which is beneficial for</p>                                           | <p>- Limited in vivo distribution data: There is currently a lack of comprehensive data on how these nanotubes distribute within living organisms.</p> <p>- Surface modifications needed for active targeting: To enhance their ability to specifically target</p> | <p>10</p> <p>11</p> |

|  |                                                                                                                                                                                                                                                                                                                                            |                                                                                            |  |
|--|--------------------------------------------------------------------------------------------------------------------------------------------------------------------------------------------------------------------------------------------------------------------------------------------------------------------------------------------|--------------------------------------------------------------------------------------------|--|
|  | <p>targeting acidic tumor environments.</p> <p>- Intrinsic BBB Permeability: These nanotubes can cross the blood-brain barrier, highlighting their inherent ability to deliver therapeutic agents to the brain.</p> <p>- Minimal Cytotoxicity: They exhibit low toxicity to normal cells, ensuring safety in therapeutic applications.</p> | <p>certain cells or tissues, these nanotubes require additional surface modifications.</p> |  |
|--|--------------------------------------------------------------------------------------------------------------------------------------------------------------------------------------------------------------------------------------------------------------------------------------------------------------------------------------------|--------------------------------------------------------------------------------------------|--|

## References:

- 1 Y. You, N. Wang, L. He, C. Shi, D. Zhang, Y. Liu, L. Luo and T. Chen, *Dalt. Trans.*, 2019, **48(5)**, 1569-1573.
- 2 M. Caffo, A. Curcio, K. Rajiv, G. Caruso, M. Venza and A. Germanò, *Cancers*, 2023,**15(9)**, 2575.
- 3 S. K. S. Kushwaha, S. Ghoshal, A. K. Rai and S. Singh, *Brazilian J. Pharm. Sci.*, 2013, **49**, 629-643.
- 4 M. Ghaferi, A. Raza, M. Koohi, W. Zahra, A. Akbarzadeh, H. Ebrahimi Shahmabadi and S. E. Alavi, *Pharmaceutics*, 2022 , **14(10)**, 2183.

- 5 N. Kaur, P. Gautam, D. Nanda, A. S. Meena, A. Shanavas and R. Prasad, *Bioconjug. Chem.*, 2024, **35(9)**, 1283-1299.
- 6 T. Waghule, K. Laxmi Swetha, A. Roy, R. Narayan Saha and G. Singhvi, *Eur. J. Pharm. Biopharm.*, 2023 , **186**, 18-29.
- 7 S. Liu, B. Tan, F. Wang and Y. Yu, *Front. Pharmacol.*, 2024, 15.
- 8 N. Avramović, B. Mandić, A. Savić-Radojević and T. Simić, *Pharmaceutics*, 2020, 12.
- 9 M. Alsehli, *Saudi Pharm. J.*, 2020, 28.
- 10 M. Ray, S. Chatterjee, T. Das, S. Bhattacharyya, P. Ayyub and S. Mazumdar, *Nanotechnology*, 2011, 22.
- 11 M. I. Al-Shemri, M. Aliannezhadi, R. A. Ghaleb and M. J. Al-Awady, *Sci. Rep.*, 2024 , **14(1)**, 25998.
